# Supplementary material for: Near-infrared light reduces β-amyloid-stimulated microglial toxicity and enhances survival of neurons: mechanisms of light therapy for Alzheimer’s disease
Source: PubMed Central journal article supplement (PMC9206341; doi:10.1186/s13195-022-01022-7), 2022-06-18
Supplement: 13195_2022_1022_MOESM1_ESM.pdf [file 13195_2022_1022_MOESM1_ESM.pdf]

## Supplementary Materials

### Near-infrared light reduces $\beta$ -amyloid-stimulated microglial toxicity and enhances survival of neurons: Mechanisms of light therapy for Alzheimer's disease

Yurii V. Stepanov<sup>a,#</sup>, Iuliia Golovynska<sup>a,#</sup>, Renlong Zhang<sup>a,#</sup>, Sergii Golovynskiy<sup>a</sup>,  
Liudmyla I. Stepanova<sup>b</sup>, Oleksandr Gorbach<sup>c</sup>, Taisa Dovbynchuk<sup>b</sup>, Liudmyla V. Garmanchuk<sup>b</sup>,  
Tymish Y. Ohulchanskyi<sup>a</sup>, Junle Qu<sup>a,\*</sup>

<sup>a</sup> Center for Biomedical Optics and Photonics, College of Physics and Optoelectronic Engineering, Shenzhen University, Shenzhen, 518060, P.R. China

<sup>b</sup> Institute of Biology and Medicine, Taras Shevchenko National University of Kyiv, Kyiv, 01601, Ukraine

<sup>c</sup> Laboratory of Experimental Oncology, National Cancer Institute of Ukraine, Kyiv, 03022, Ukraine

\* Corresponding Authors: E-mail: jlqu@szu.edu.cn

# Equal contributed authors

#### Methods

**Flow Cytometry.** Determination of the primary microglia derived from mice was performed by flow cytometry using primary rabbit anti-mouse IBA1 Polyclonal antibodies (Invitrogen, USA) and secondary goat anti-rabbit Alexa Fluor 647 antibodies (Invitrogen, USA). The amount of  $3 \times 10^5$  cells was used to prepare three sample tubes. The cell suspension was pelleted by centrifugation at  $400 \times g$  for 5 min and washed with 2 ml of PBS (pH 7.2) and 0.4% BSA. The cells were incubated with primary rabbit anti-mouse IBA1 Polyclonal antibodies (1:1000 dilutions) at room temperature for 20 min. After washing with PBS plus 0.4% BSA for 5 min at  $400 \times g$ , the cells were incubated with secondary goat anti-rabbit Alexa Fluor 647 antibodies (1:1000 dilution) at room temperature for 20 min. The cells were washed with 2 ml of PBS (pH 7.2) and 0.4% BSA for 5 min at  $400 \times g$ .

The pellet was fixed by adding 400  $\mu$ l of 0.4% formalin solution in PBS. Sample measurements were performed no later than 3 days, exploiting a flow cytometer BD FACS Aria II (Becton Dickinson, USA) with 635 nm laser using the FACS Diva software (Becton Dickinson, USA). 7-AAD (7-Amino-Actinomycin D) was used to discriminate the dead cells that could give a nonspecific signal. Only the viable cells were included in the assay.

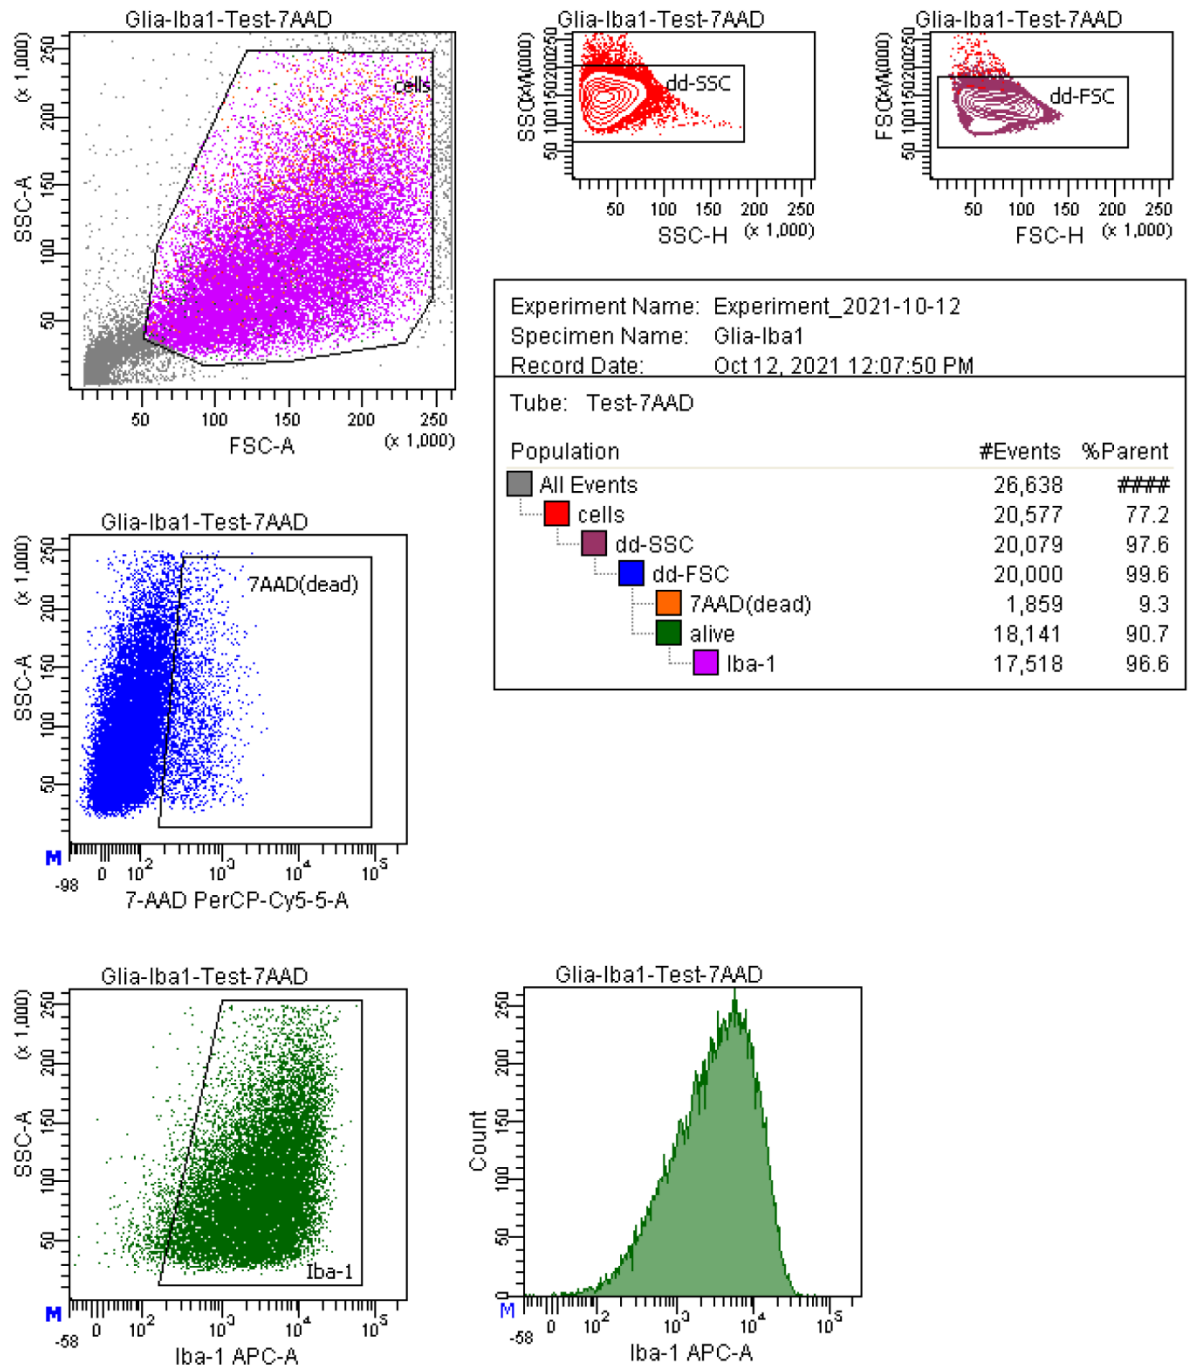

**Fig. S1** Flow cytometry gating scheme of dots and histogram-plots of primary microglia cells obtained from mice using primary rabbit anti-mouse IBA1 Polyclonal antibodies and secondary goat anti-rabbit Alexa Fluor 647 antibodies.

***Nitric oxide production (Griess reaction).*** The level of NO production was measured in the microglia supernatant, using Griess reaction [54]. The supernatants were transferred to a 96-well plate, and Griess's reagent (2% sulfanilamide in 10% phosphoric acid and 0.2% N-1-naphthylethylenediamine dihydrochloride (NED) in de-ionized water (Sigma-Aldrich, USA)) was added. 100  $\mu$ l of Griess's reagent was added to 100  $\mu$ l of cell culture medium. The plate was incubated at room temperature in the dark for 30 min. The results were recorded spectrophotometrically by an Ascent plate photometer (Labsystems, Finland) at 540 nm wavelength. The NO level was determined by dint of a calibration curve, constructed using standard sodium nitrite solutions. The samples were set in three repetitions for each variant of the experiment. The value was divided by the number of living cells in the sample. The NO levels were presented for  $10^6$  cells.

***Arginase activity.*** The arginase activity in cell lysates was assessed by the method proposed by Classen et al. [55]. The studied cell population was sequentially treated with 100  $\mu$ l of 0.1% Triton X-100, 100  $\mu$ l 50 mM Tris-HCl (pH 7.5) containing 10 mM  $MnCl_2$ . The mixture was heated at 56° C for 7 min to activate arginase activity. The hydrolysis reaction of L-arginine was carried out by incubating a mixture containing pre-activated arginase from 100  $\mu$ L of L-arginine (0.5 M, pH 9.7) at 37° C for 2 h. To stop the reaction, 800  $\mu$ L of a mixture of acids ( $H_2SO_4$ :  $H_3PO_4$ :  $H_2O$  = 1: 3: 7) was added to the samples. Colorimetric detection of urea was carried out by adding  $\alpha$ -isonitrosopropiophenone (40  $\mu$ l, 6% in ethanol) to the mixture with further incubation at 95° C for 30 min and then at 4° C for 30 min (all reagent from Sigma-Aldrich, USA). The concentration of urea was measured spectrophotometrically using an Ascent plate photometer (Labsystems, Finland) at 545 nm wavelength. The optical density value was converted into micrograms of urea, using a calibration curve constructed from standard solutions of urea of a known concentration. The data were analysed using the following formula:  $\mu$ g of urea / 60 (molecular weight of urea)  $\times$  50 (dilution factor) / t (minutes of the incubation with arginine) = arginase units per  $1 \times 10^6$  cells; 1 unit equals the amount of enzyme required to hydrolyse 1  $\mu$ M of arginine per minute.

***Glucose 6-phosphate dehydrogenase activity assay.*** G6PD activity was assessed using a commercial assay (Cell Signalling Technology, UK) according to the manufacturer's instructions. Following treatment according to the experimental design, the cells were lysed by ultrasonication ( $2 \times 20$ s at 20kHz) in assay lysis buffer (22 mM Tris-HCl, 150 mM NaCl, 1 mM  $Na_2EDTA$ , 1 mM EGTA, 1% Triton X-100, 20 mM sodium pyrophosphate, 25 mM sodium fluoride, 1 mM  $\beta$ -glycerophosphate, 1 mM sodium orthovanadate, 1  $\mu$ g/ml leupeptin, 1 mM phenylmethane sulfonyl fluoride, pH 7.5, 4°C) using a Soniprep 150 (BMG Labtech, UK), centrifuged at  $14,000\times g$  and 4°C for 10 min. The lysates were then collected. The samples were diluted to 0.2 mg/ml in the assay buffer, incubated at 37°C for 15 min with an assay substrate and then the fluorescence was analysed using a multilink spectrophotometer  $\mu$ Quant (Bio-Tek, USA) with excitation and emission filters set at 540 and 590 nm, respectively.

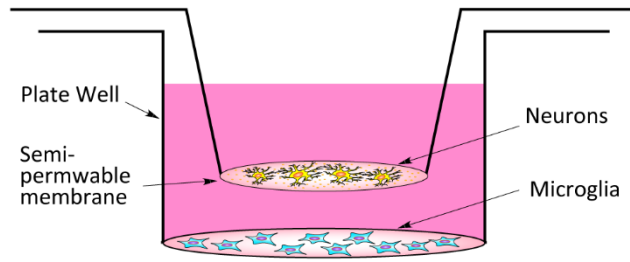

**Fig. S2** Neurons and microglia transferring into a Boyden chamber of two medium-filled compartments separated by a microporous membrane.

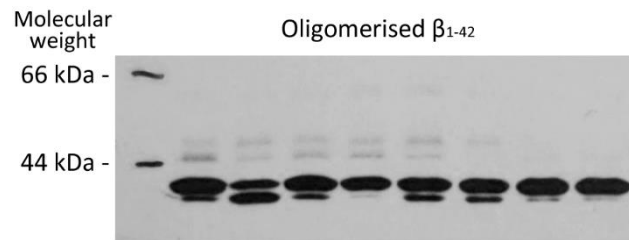

**Fig. S3** Approximate molecular weight of A $\beta$ 1-42 oligomers following Western blotting under non-denaturing conditions. Oligomeric A $\beta$  migrated at approximately 38 kDa, indicating the presence of hexamers/octamers.

# Results

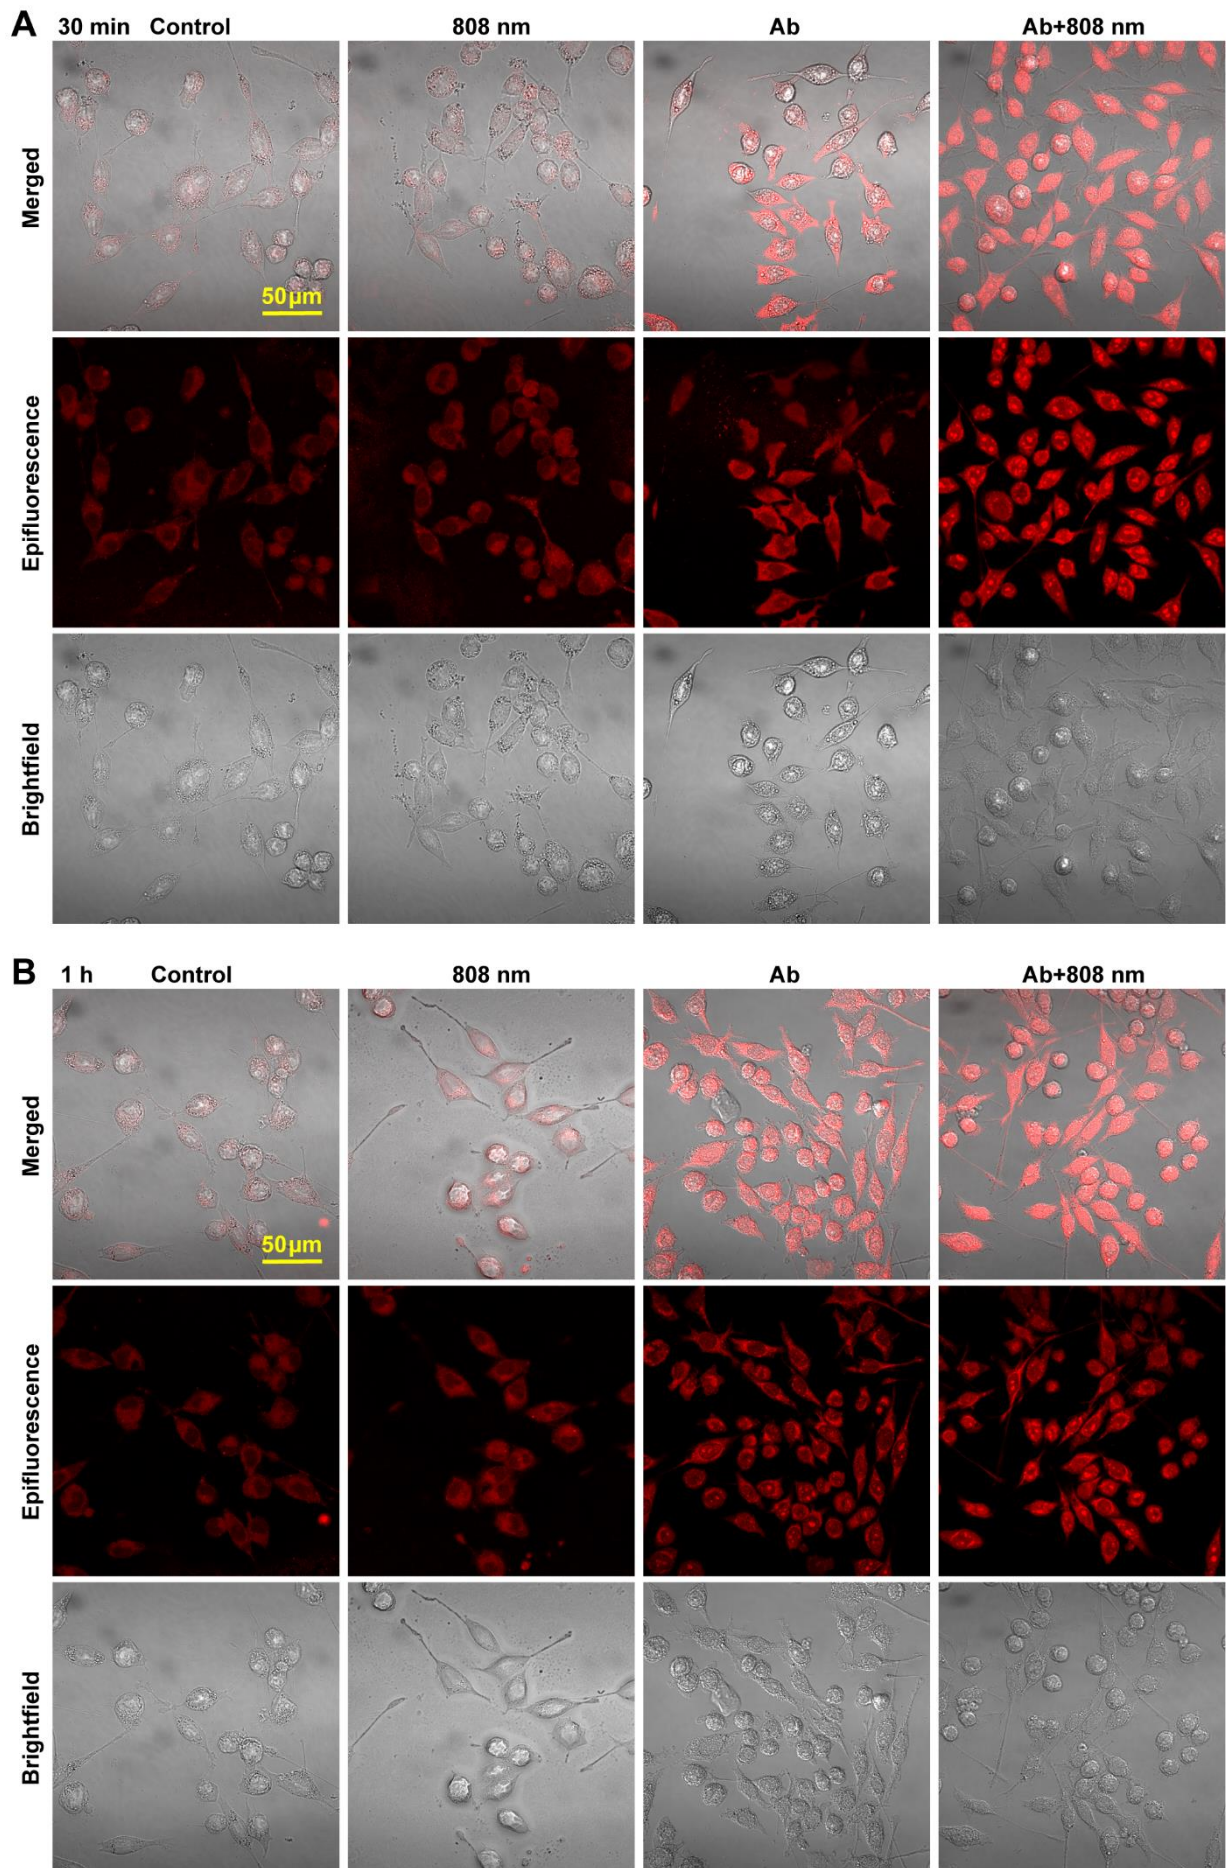

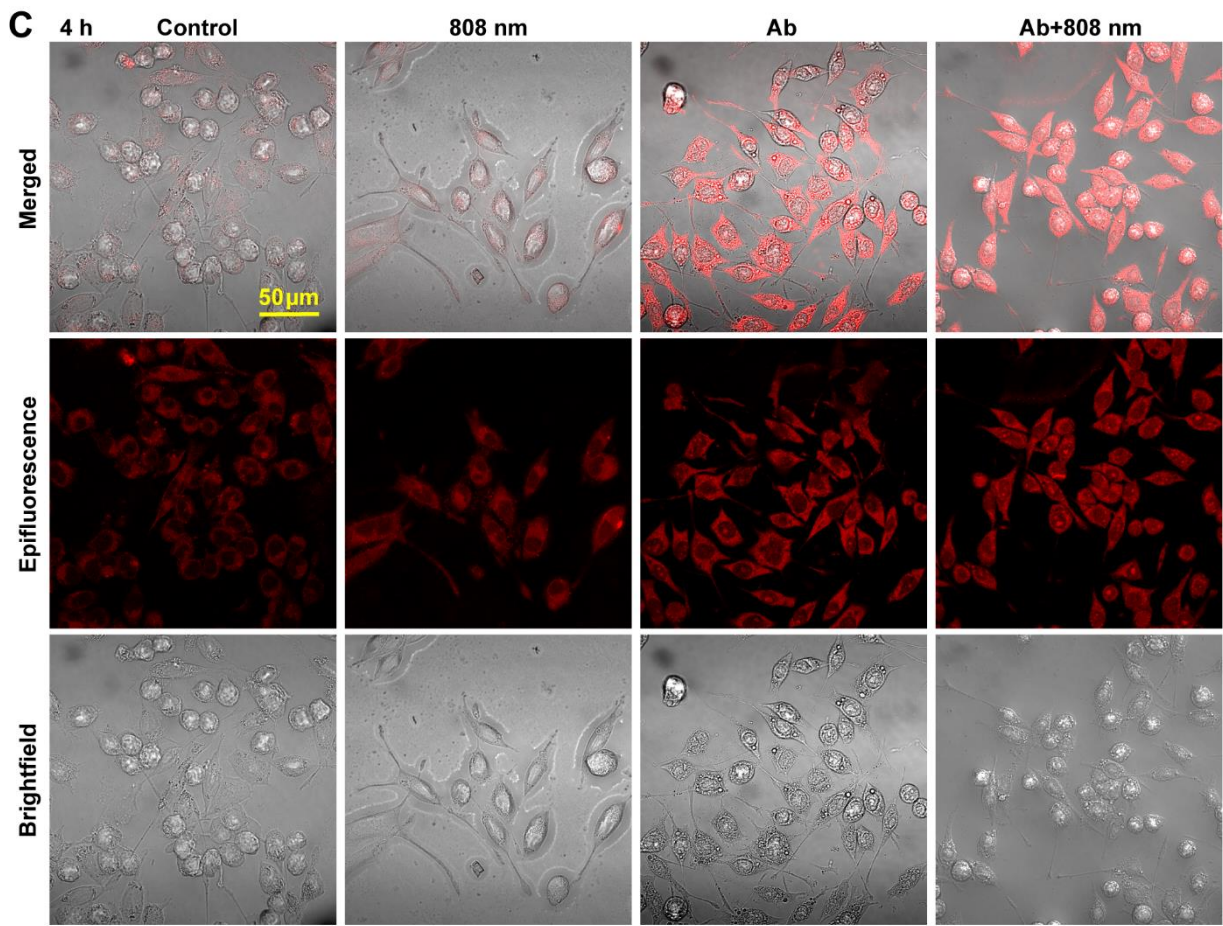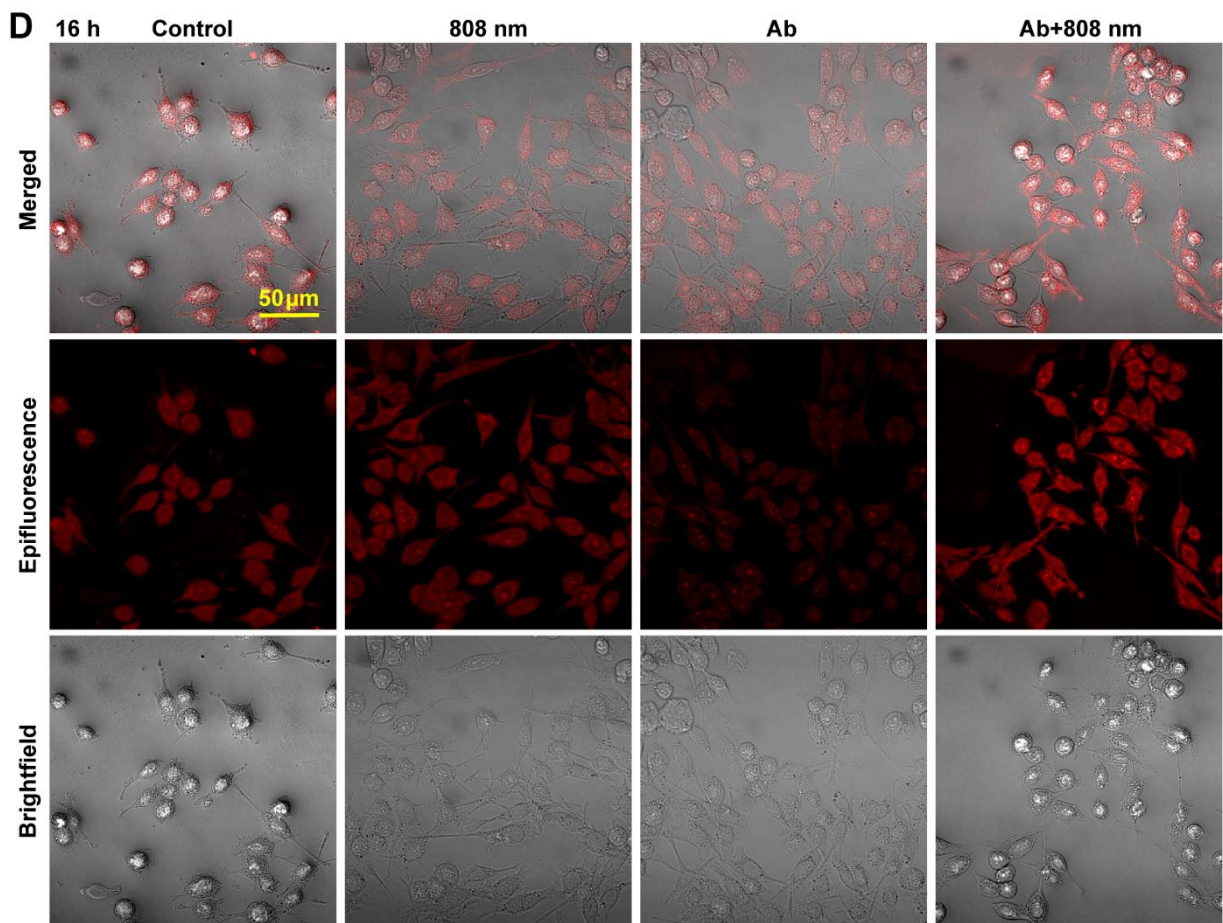

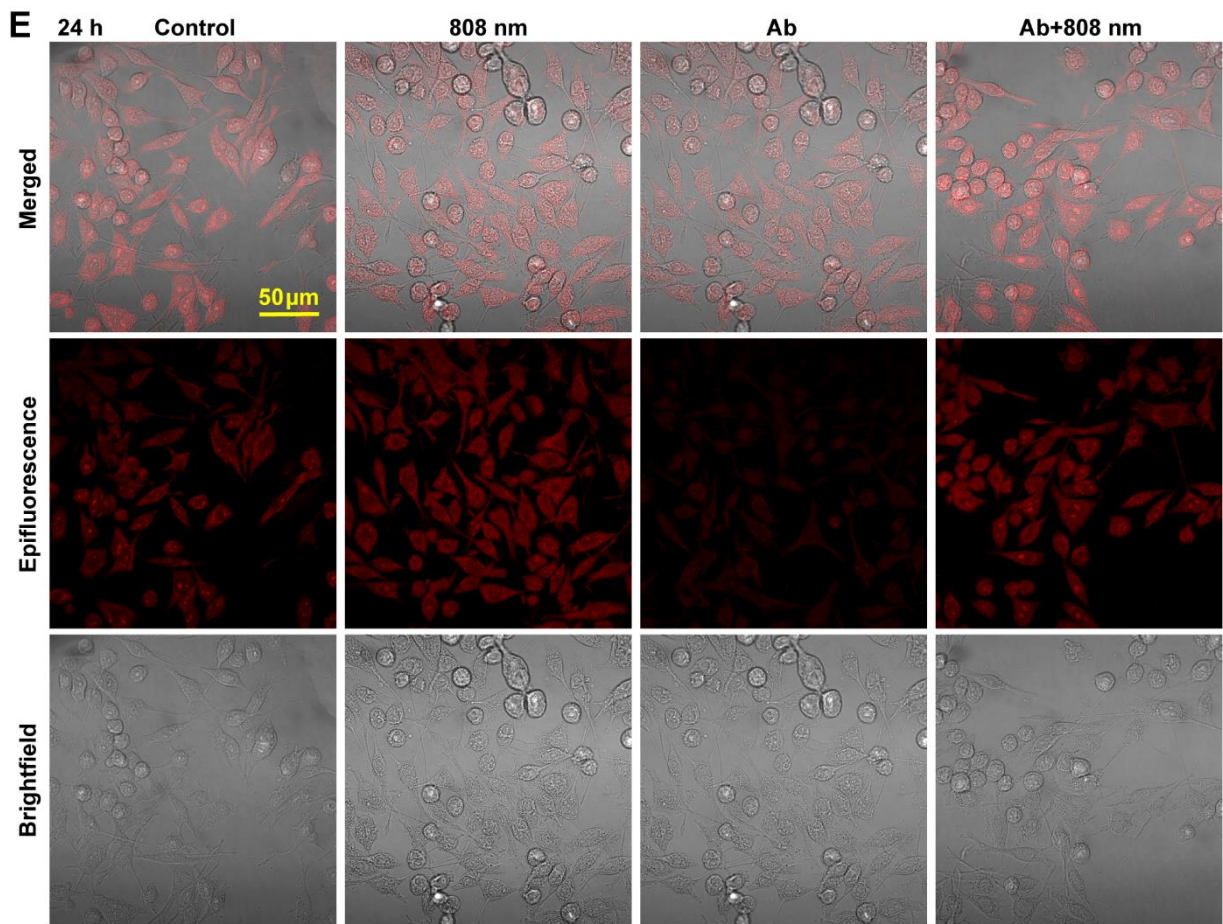

**Fig. S4 NIR light activation phagocytosis of A $\beta$ -treated microglia cells.** The representative transmission microscopy images showing changes in the fluorescence signal from A $\beta$  following stimulation by non-fluorescent A $\beta$ , low-intensity light at 808 nm with 10 J/cm<sup>2</sup> and both A $\beta$  and light after (A) 30 min, (B) 2 h, (C) 4 h, (D) 16 h, and (E) 24 h.

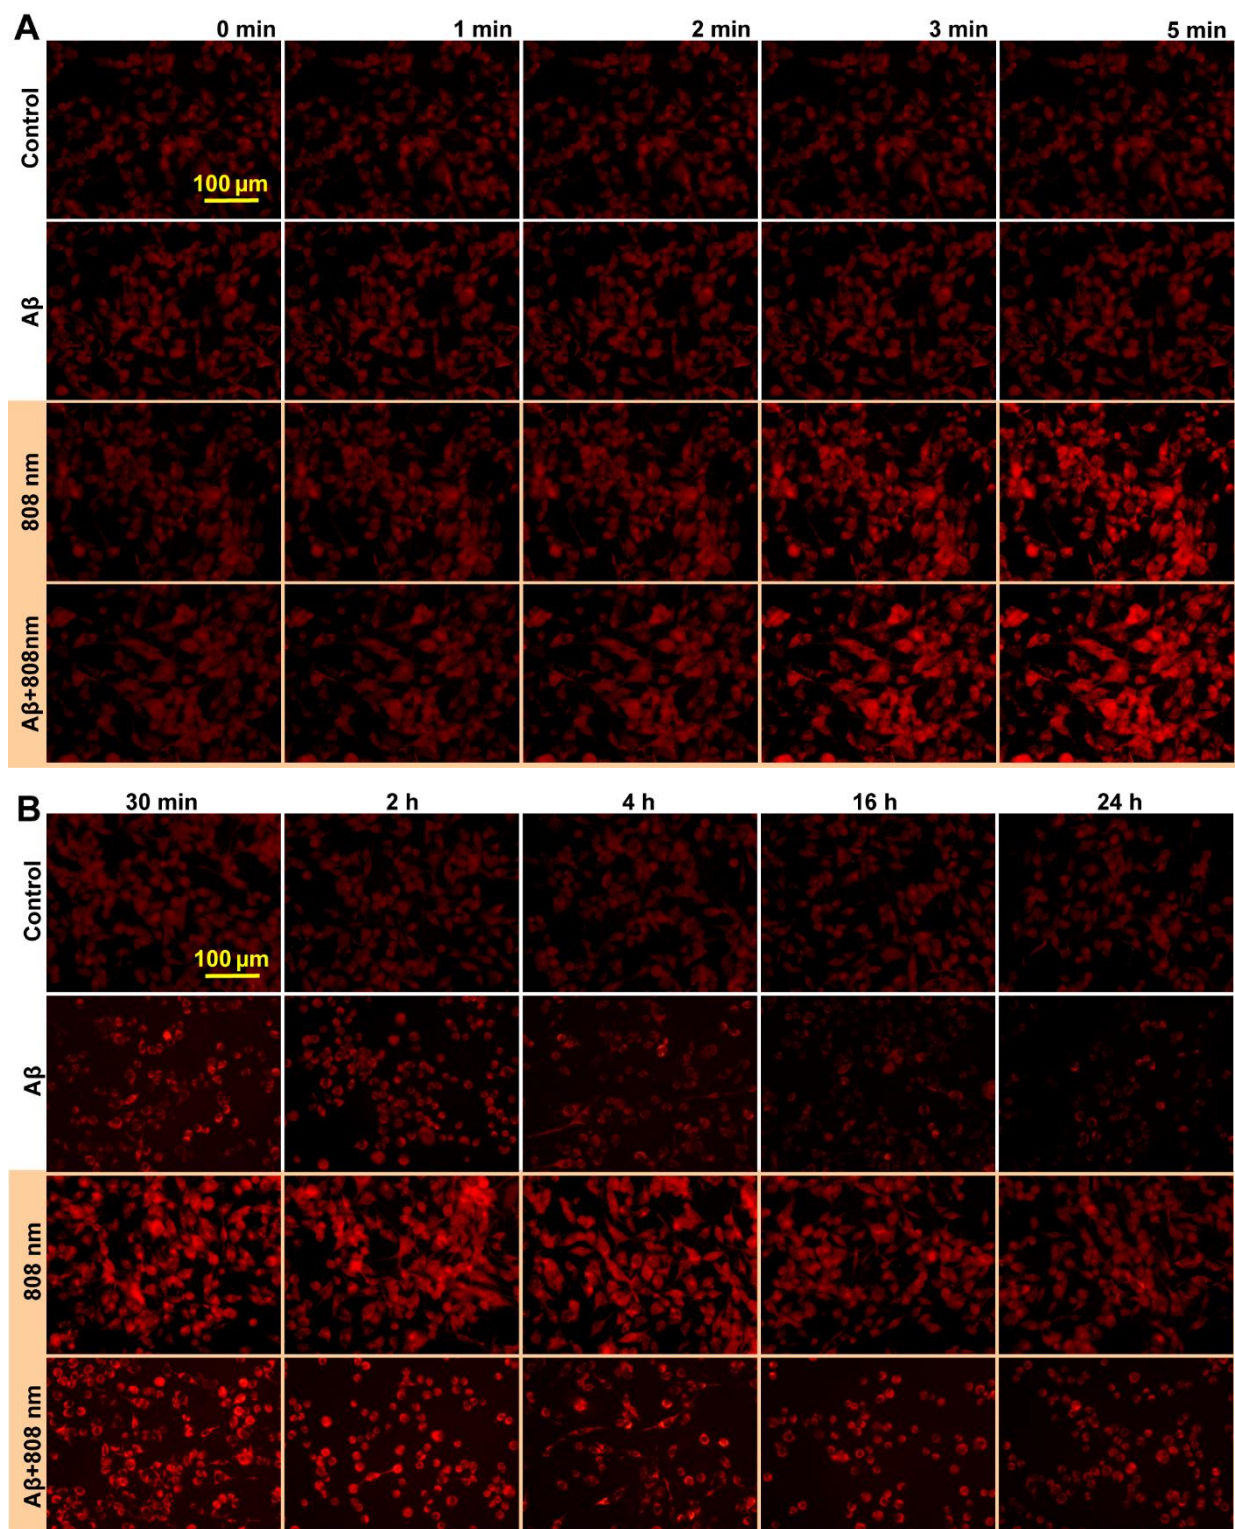

**Fig. S5 Mitochondrial membrane potential activation following A $\beta$  and 808 nm light treatment.** Epifluorescence microscopy images showing the effect of 808 nm light with 10 J/cm<sup>2</sup>, A $\beta$  and both A $\beta$  with 808 nm light on microglia cells labelled with TMRM. Dynamic images showing the effect during (A) 5 min and (B) 24 h.



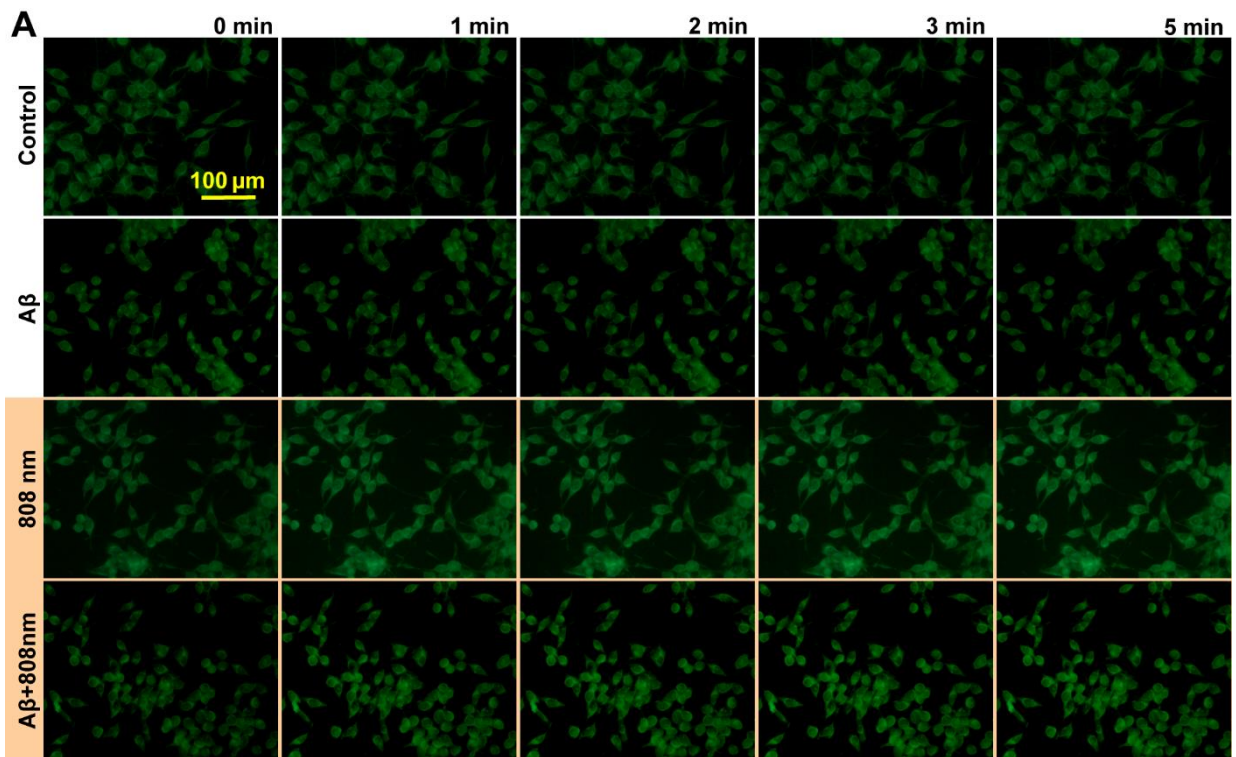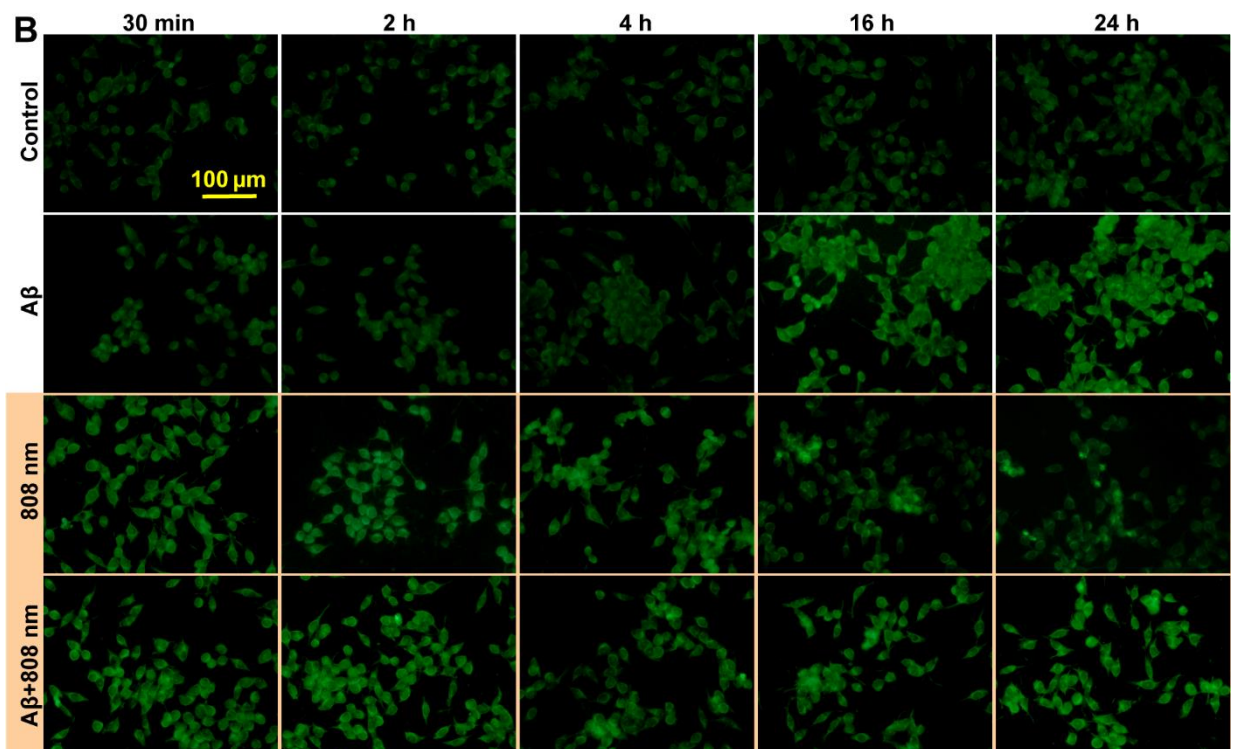

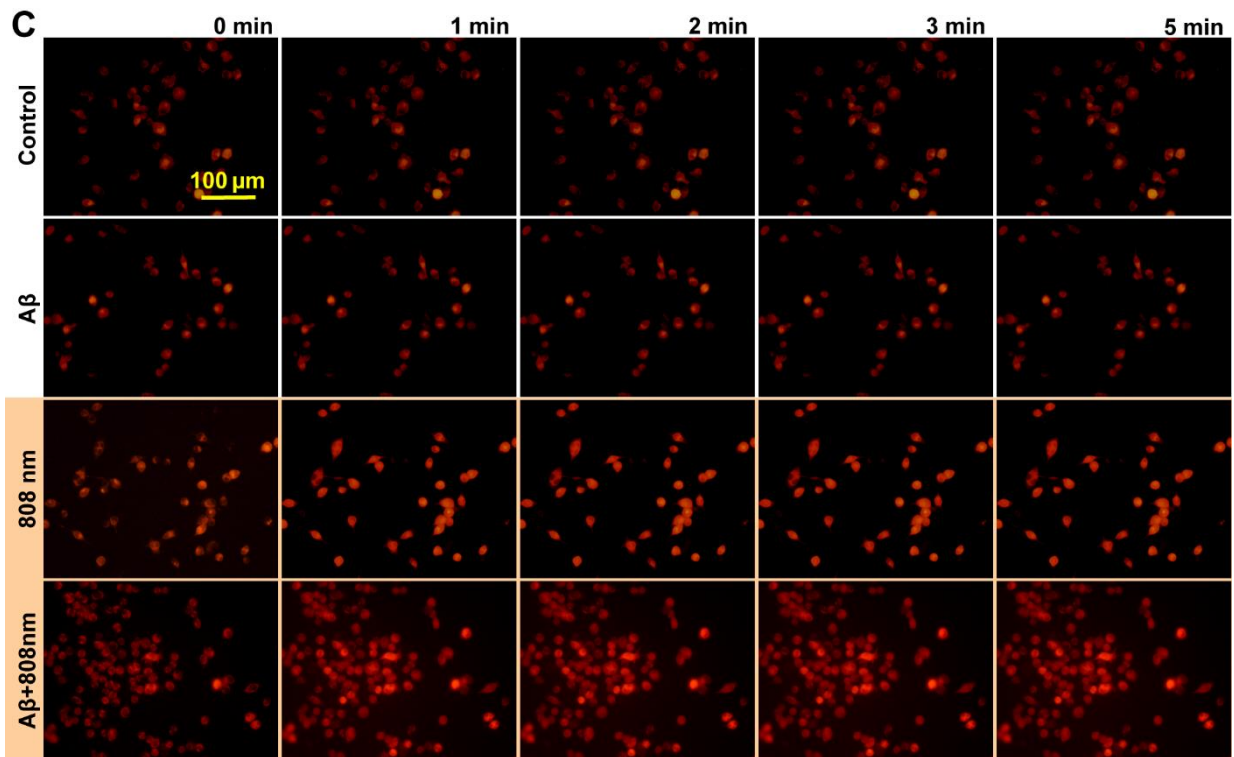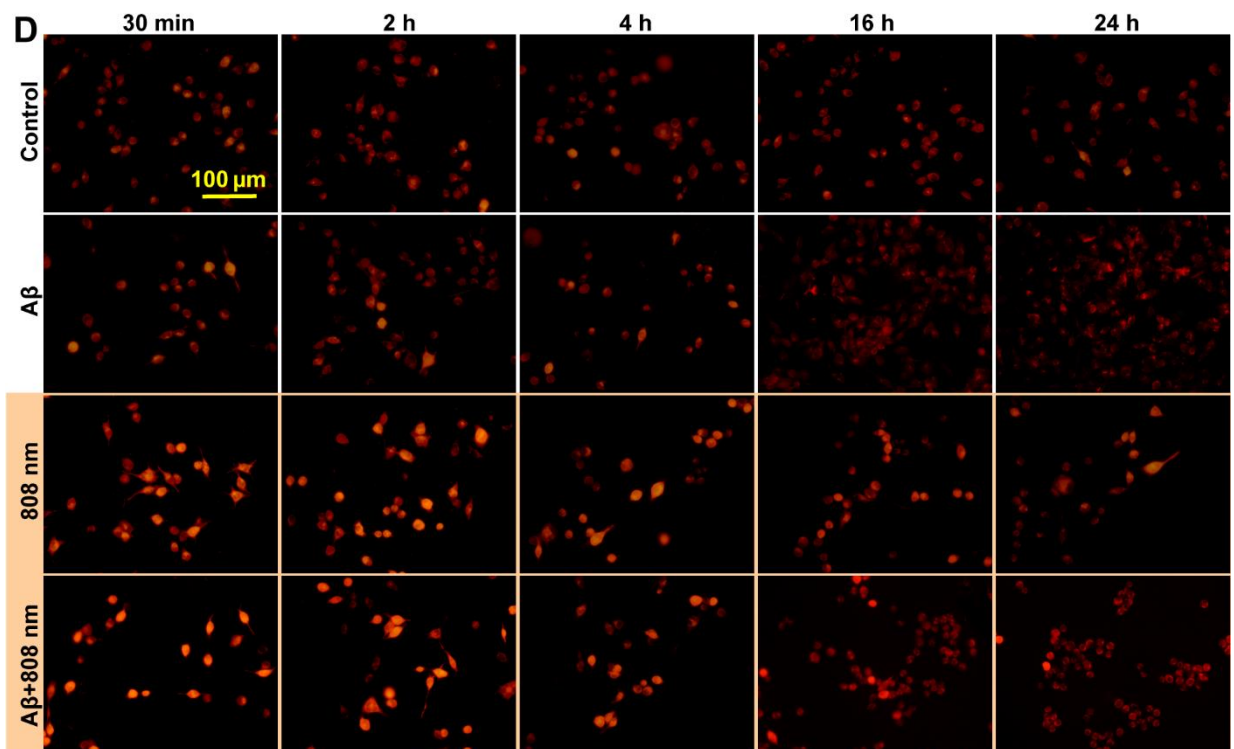

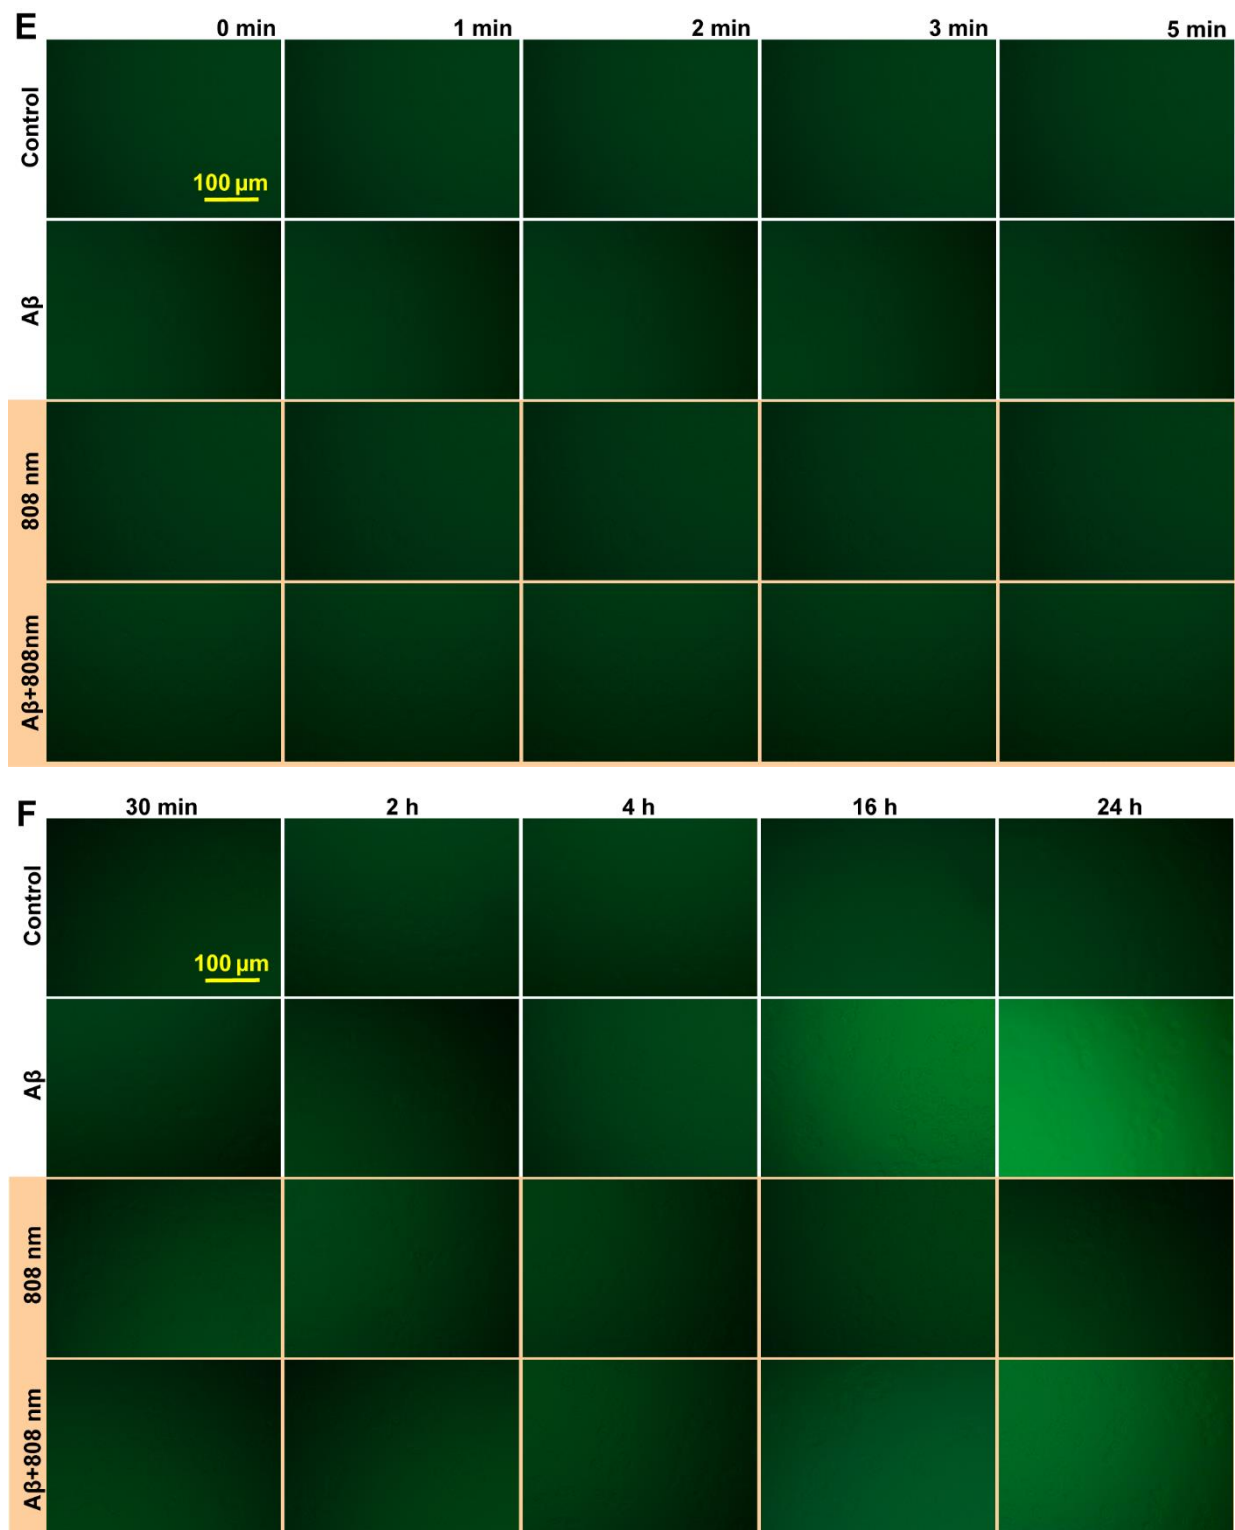

**Fig. S6 NIR light effect on general ROS generation, mitochondrial ROS generation and ROS generation in the medium measured for A $\beta$ -treated microglia.** Epifluorescence microscopy images showing the effect of 808 nm light with 10 J/cm<sup>2</sup>, A $\beta$  and both A $\beta$  with light on microglia cells stained with (A), (B) CM-H2DCFDA for general ROS detection, (C), (D) MitoSOX™ for mitochondrial ROS detection, and (E), (F) ROS-Glo™ for ROS detection in the medium. Dynamic images showing the effect during (A), (C), (E) 5 min and (B), (D), (F) 24 h.

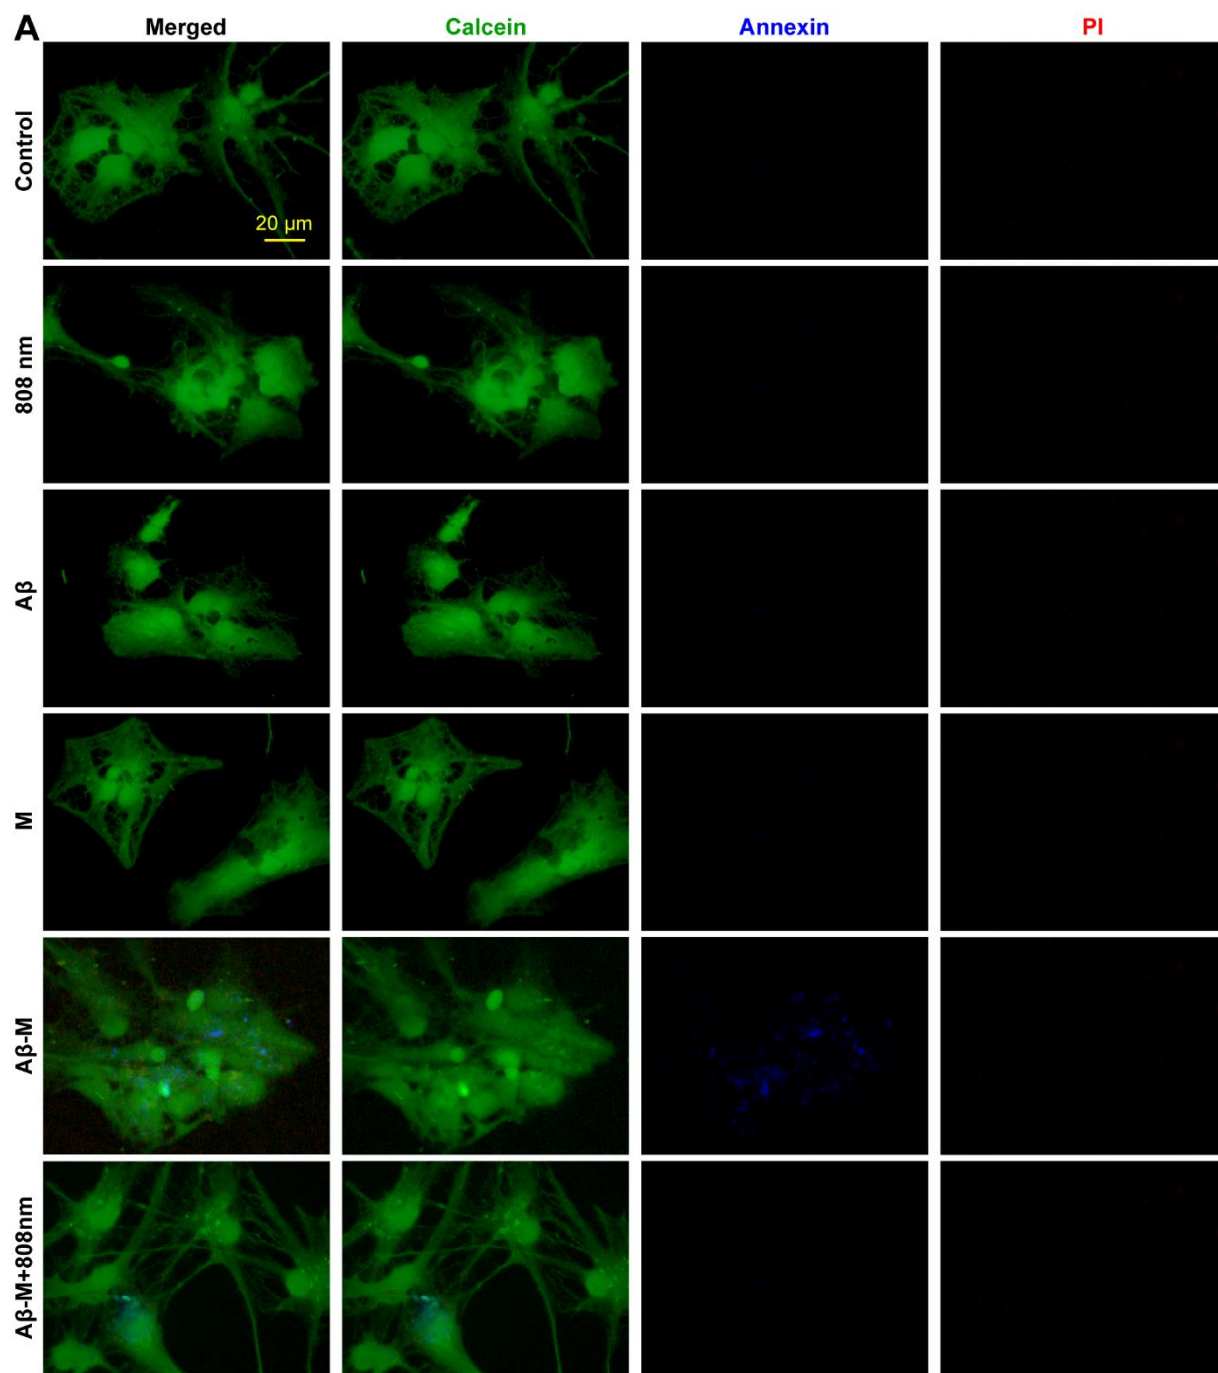

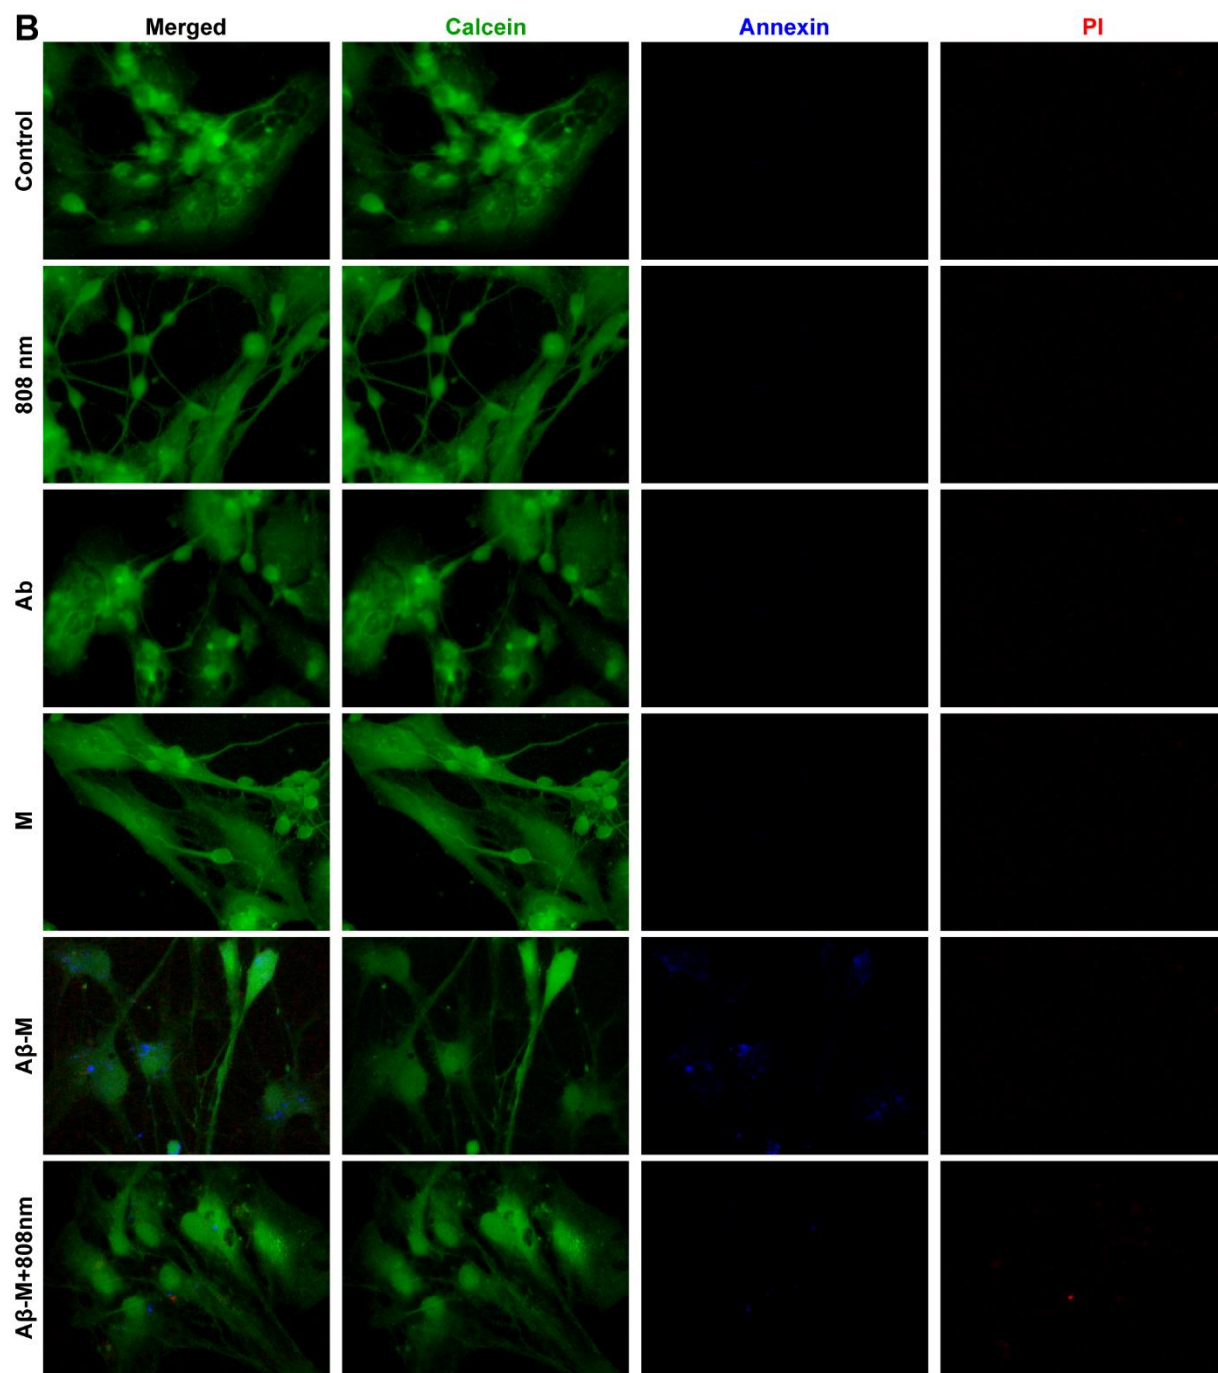

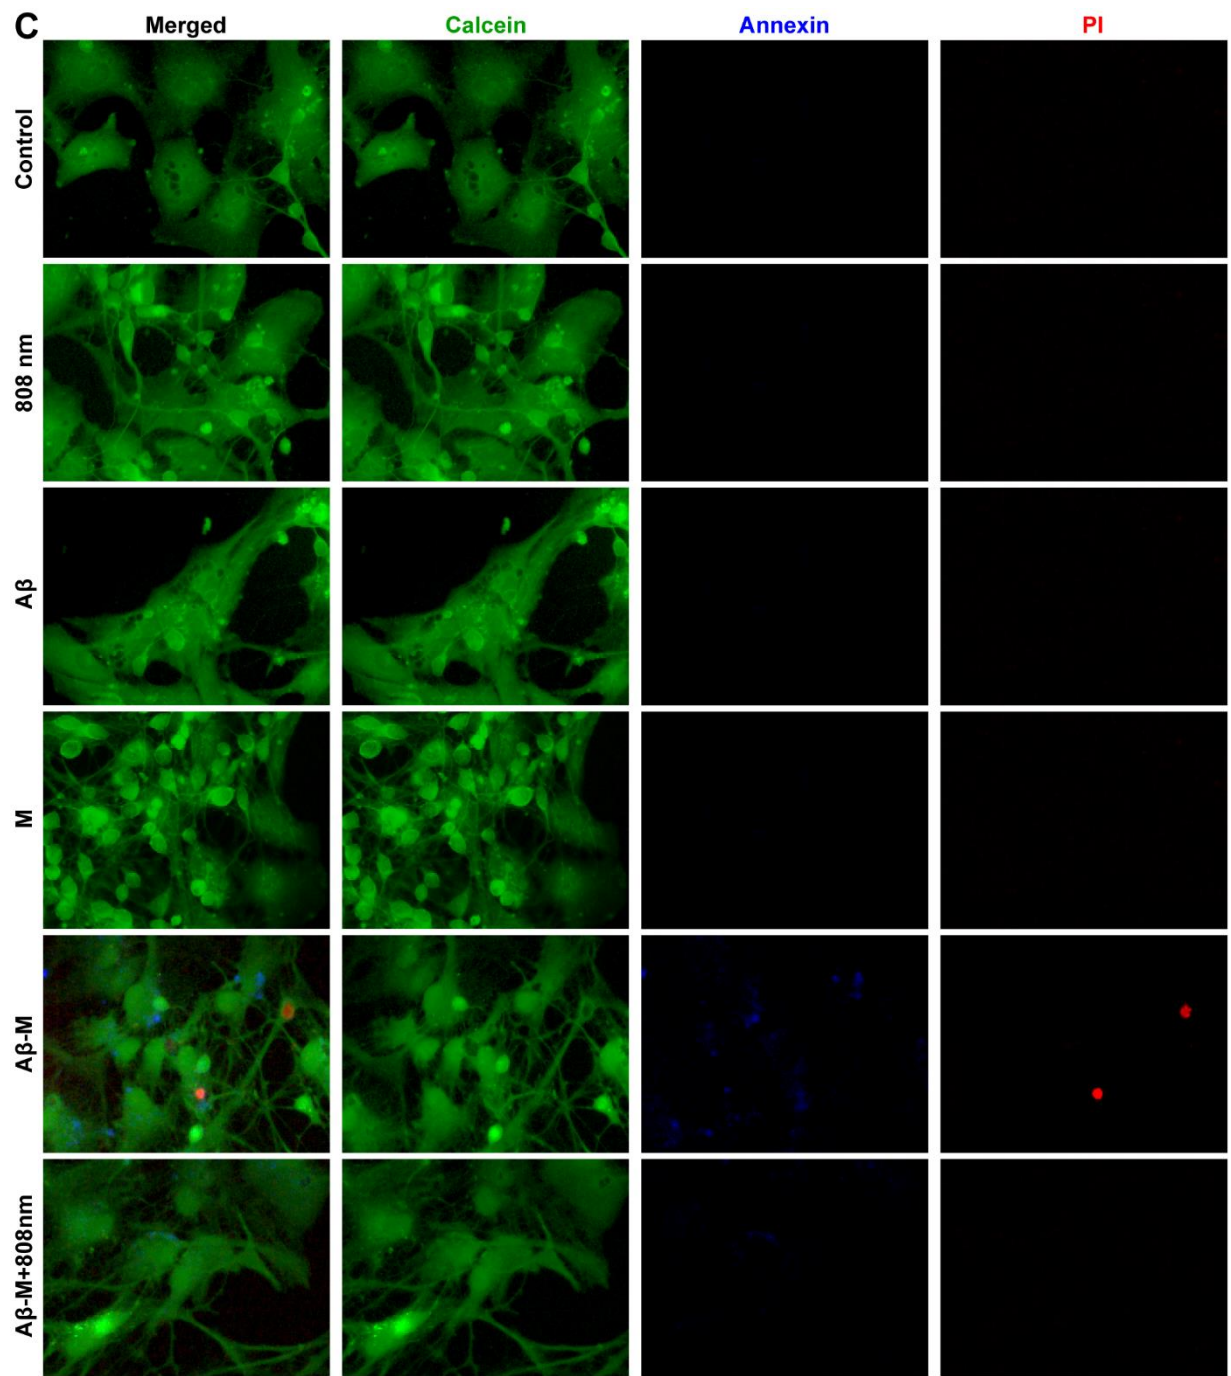

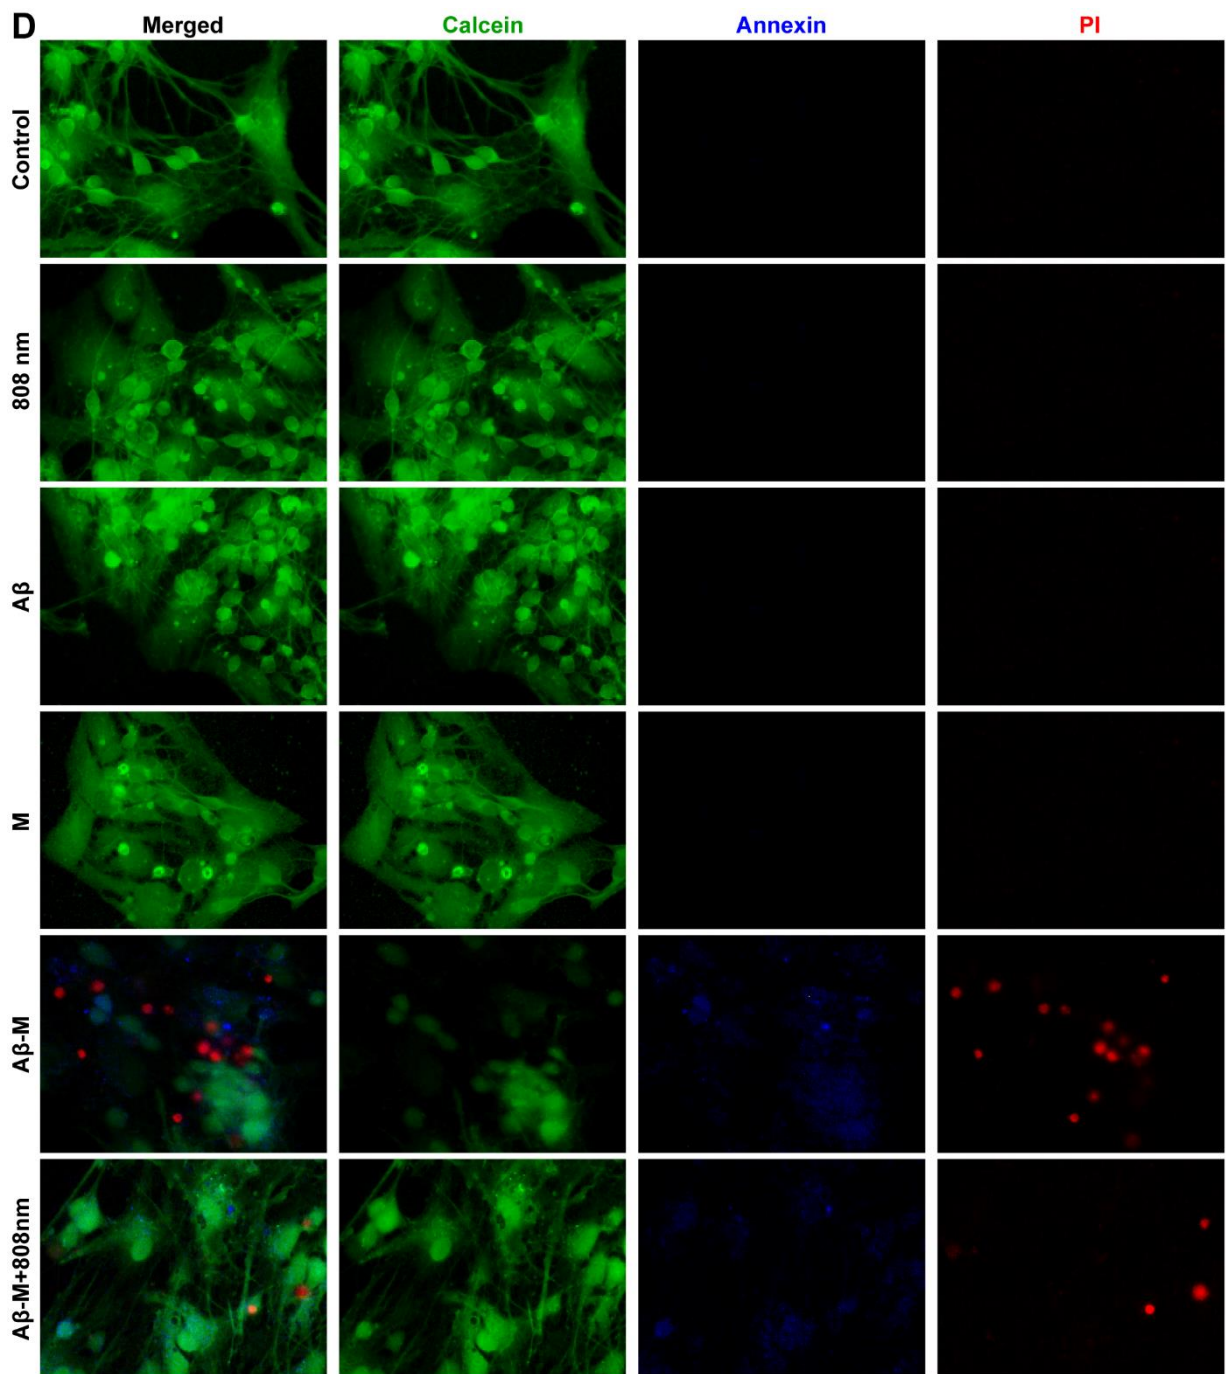

**Fig. S7 Increased neuron viability after 808 nm light exposure in co-culture with A $\beta$  stimulated microglia (M).** Epifluorescence microscopy images showing the effect of light, A $\beta$ , co-cultivation with M, co-cultivation with A $\beta$ -M, and co-cultivation with A $\beta$ -M+808 nm light on neuron viability with Calcein (green) to visualize the live cells, Annexin (blue) for apoptosis and Propidium Iodide (red) for necrosis detection after (A) 6h, (B) 12h, (C) 24 h, and (D) 48 h.

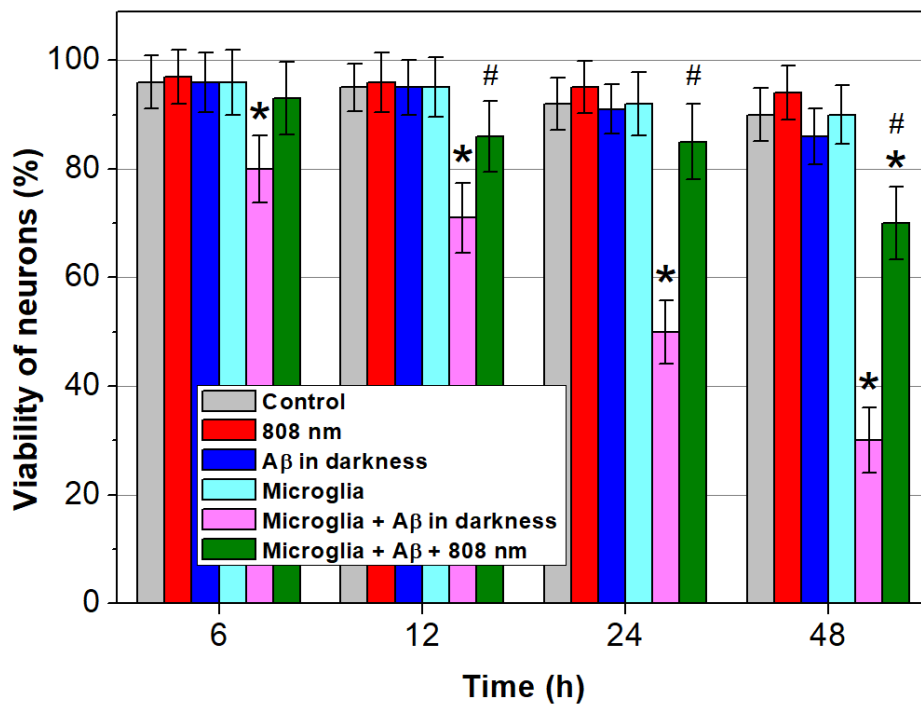

**Fig. S8 Increased neuron viability after 808 nm light exposure in co-culture with A $\beta$ -stimulated microglia.** Cell viability was determined using trypan blue dye. The data are presented as the mean  $\pm$  SD ( $n = 6$  replicates in each group); \* $p < 0.05$  indicates data with a statistically significant difference evaluated in relation to the control level, and # $p < 0.05$  indicates data with a statistically significant difference evaluated in relation to the level during co-cultivation with A $\beta$ -treated microglia (two-way ANOVA test).
